# Supplementary material
Source: PubMed Central journal article supplement (PMC3136632)
Supplement: NIHMS302907-supplement-1_si_001.pdf [file NIHMS302907-supplement-1_si_001.pdf]

Supplementary Materials

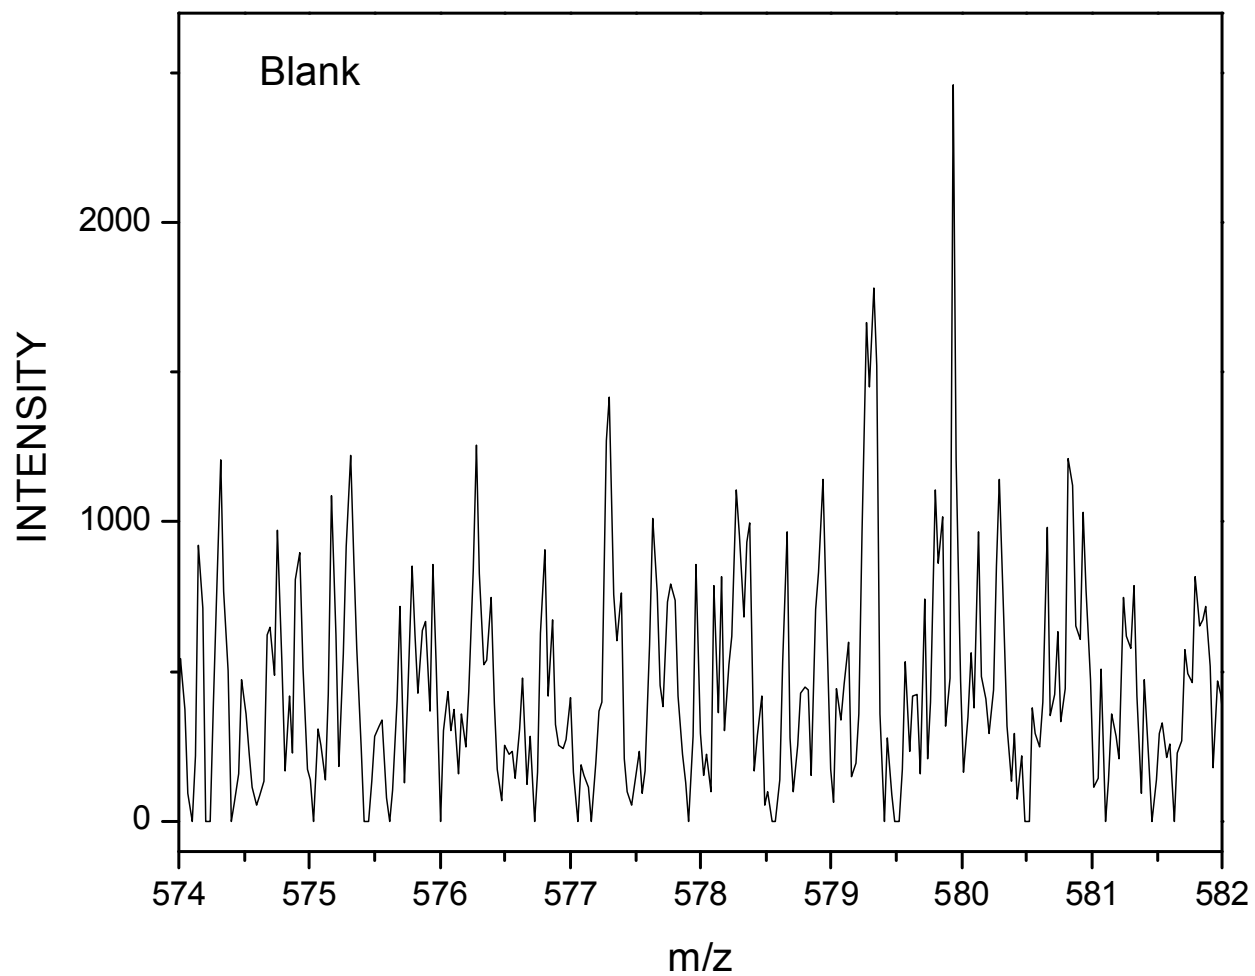

Figure S1: Mass spectrum of the blank buffer infused prior to the LOD experiment shown in Figure 4a.
